# Supplementary material
Source: Research Square preprint supplement (doi:10.21203/rs.3.rs-8941374/v1)
Supplement: Supplementary file 1 [file 02d5a9694c23e223c32c2a1c.docx]

**Table (8):** **The IL-10 levels in the three studied groups at different time intervals**

| **IL-10 (pg/mL)** | **Group** | | | **Test of significance**  ***p*-value** |
| --- | --- | --- | --- | --- |
| **Control** | **Extraction without bone graft** | **Extraction with bone graft** |
| **Four weeks**   - n - Min. – Max. - Mean ± Std. Deviation - SEM - 95% CI of the Mean - 25th - 75th Percentile | 5  59.70-66.00  62.10**a**±2.43  1.09  59.08-65.12  60.50-62.40 | 5  50.50-59.70  53.10**b**±3.76  1.68  48.43-57.77  51.00-52.40 | 5  45.70-47.90  46.680**c**±0.85  0.38  45.62-47.74  46.10-47.00 | F(BF)(df=2,7.329)=43.264  *p*<.001* |
| **Six weeks**   - n - Min. – Max. - Mean ± Std. Deviation - SEM - 95% CI of the Mean - 25th - 75th Percentile | 5  59.70-66.00  62.38**a**±3.32  1.49  58.26-66.50  59.70-66.00 | 5  36.50-39.70  38.54**b**±1.38  0.62  36.83-40.25  37.80-39.70 | 5  54.00-59.70  57.38**c**±2.45  1.10  54.33-60.43  56.00-59.70 | F(BF)(df=2,8.898)=125.058  *p*<.001* |
| **Paired t-test**  ***p*-value** | t(df=4)=0.202  *p*=.850 NS | t(df=4)=8.561  *p*=.001* | t(df=4)=11.089  *p*<.001* |  |
| Four weeks | | | | |
|  | **Control** | **Extraction without bone graft** | **Extraction with bone graft** |  |
| **Control** |  | **Diff=9.00**  ***p<*.001** | **Diff=15.42**  ***p<*.001** |
| **Extraction without bone graft** |  |  | **Diff=6.42**  ***p=*.007** |
| Six weeks | | | | |
|  | **Control** | **Extraction without bone graft** | **Extraction with bone graft** |  |
| **Control** |  | **Diff=23.84**  ***p<*.001** | **Diff=5.00**  ***p=*.025*** |
| **Extraction without bone graft** |  |  | **Diff=18.84**  ***p<*.001** |

n: number of rats Min-Max: Minimum – Maximum

S.D.: Standard Deviation SEM: Standard Error of Mean CI: Confidence interval

F: F(ANOVA) Test of Analysis F(BF): Brown-Forsythe df: degree of freedom

*: Statistically significant (*p*<.05) NS: Statistically not significant (*p*≥.05) NA: not applicable
