# Supplementary material
Source: Research Square preprint supplement (doi:10.21203/rs.3.rs-8941374/v1)
Supplement: Supplementary file 2 [file 23c87ed0417741caead70089.docx]

**Table (6):** **The IL-6 levels in the three studied groups at different time intervals**

| **IL-6 (pg/mL)** | **Group** | | | **Test of significance**  ***p*-value** |
| --- | --- | --- | --- | --- |
| **Control** | **Extraction without bone graft** | **Extraction with bone graft** |
| **Four weeks**   - n - Min. – Max. - Mean ± Std. Deviation - SEM - 95% CI of the Mean - 25th - 75th Percentile | 5  213.50-220.40  217.38**a**±2.53  1.13  214.24-220.52  216.80-218.30 | 5  445.00-460.00  452.08**b**±5.67  2.54  445.04-459.12  450.00-455.00 | 5  341.00-360.00  350.28**c**±7.60  3.40  340.85-359.71  345.00-355.00 | F(BF)(df=2,8.415)=2159.121  *p*<.001* |
| **Six weeks**   - n - Min. – Max. - Mean ± Std. Deviation - SEM - 95% CI of the Mean - 25th - 75th Percentile | 5  213.50-220.40  217.22**a**,**c**±3.50  1.57  212.87-221.57  213.50-220.40 | 5  321.00-360.00  347.40**b**±15.76  7.05  327.83-366.97  345.00-356.00 | 5  217.00-237.90  227.00**a**,**c**±7.49  3.35  217.70-236.30  225.00-228.30 | F(BF)(df=2,6.177)=248.961  *p*<.001* |
| **Paired t-test**  ***p*-value** | t(df=4)=0.128  *p*=.905 NS | t(df=4)=14.110  *p*<.001* | t(df=4)=40.544  *p*<.001* |  |
| four weeks | | | | |
|  | **Control** | **Extraction without bone graft** | **Extraction with bone graft** |  |
| **Control** |  | **Diff=234.70**  ***p<*.001** | **Diff=132.90**  ***p<*.001** |
| **Extraction without bone graft** |  |  | **Diff=101.80**  ***p<*.001** |
| six weeks | | | | |
|  | **Control** | **Extraction without bone graft** | **Extraction with bone graft** |  |
| **Control** |  | **Diff=130.18**  ***p<*.001** | Diff=9.70  *p=*.475 NS |
| **Extraction without bone graft** |  |  | **Diff=120.40**  ***p<*.001** |

n: number of rats Min-Max: Minimum – Maximum

S.D.: Standard Deviation SEM: Standard Error of Mean CI: Confidence interval

F: F(ANOVA) Test of Analysis F(BF): Brown-Forsythe df: degree of freedom

*: Statistically significant (*p*<.05) NS: Statistically not significant (*p*≥.05) NA: non applicable
