# Supplementary material
Source: Research Square preprint supplement (doi:10.21203/rs.3.rs-8941374/v1)
Supplement: Supplementary file 3 [file 2842ecf2010b3afadc66cccc.docx]

**Table (2):** **The BMP1 levels in the three studied groups at different time intervals**

| **BMP1 (mg/L)** | **Group** | | | **Test of significance**  ***p*-value** |
| --- | --- | --- | --- | --- |
| **Control** | **Extraction without bone graft** | **Extraction with bone graft** |
| **Four weeks**   - n - Min. – Max. - Mean ± Std. Deviation - SEM - 95% CI of the Mean - 25th - 75th Percentile | 5  94.3-96.7  95.6**a**±1.0  0.4  94.4-96.8  94.9-96.1 | 5  71.4-74.2  72.9**b**±1.1  0.5  71.5-74.2  72.3-73.5 | 5  85.9-88.1  86.9**c**±0.9  0.4  85.8-88.1  86.2-87.4 | F(BF)(df=2,11.716)=678.518  *p*<.001* |
| **Six weeks**   - n - Min. – Max. - Mean ± Std. Deviation - SEM - 95% CI of the Mean - 25th - 75th Percentile | 5  94.3-96.7  95.6**a**±1.2  0.5  94.1-97.1  94.3-96.7 | 5  74.0-77.5  75.5**b**±1.5  0.7  73.6-77.4  74.0-76.5 | 5  82.2-89.1  86.1**c**±2.9  1.3  82.6-89.7  84.2-88.1 | F(BF)(df=2,7.734)=125.629  *p*<.001* |
| **Paired t-test**  ***p*-value** | t(df=4)=0.00  *p*=1.00 NS | t(df=4)=3.091  *p*=.037* | t(df=4)=0.789  *p*=..471 NS |  |
| **Four weeks** | | | | |
|  | **Control** | **Extraction without bone graft** | **Extraction without bone graft** |  |
| **Control** |  | **Diff=22.70**  ***p<*.001** | **Diff=8.64**  ***p<*.001** |
| **Extraction without bone graft** |  |  | **Diff=-14.06**  ***p<*.001** |
| **Six weeks** | | | | |
|  | **Control** | **Extraction without bone graft** | **Extraction without bone graft** |  |
| **Control** |  | **Diff=20.08**  ***p<*.001** | **Diff=9.44**  ***p<*.001** |
| **Extraction without bone graft** |  |  | **Diff=10.64**  ***p<*.001** |

n: number of rats Min-Max: Minimum – Maximum

S.D.: Standard Deviation SEM: Standard Error of Mean CI: Confidence interval

F: F(ANOVA) Test of Analysis F(BF): Brown-Forsythe df: degree of freedom

*: Statistically significant (*p*<.05)

NS: Statistically not significant (*p*≥.05)
