# Supplementary material
Source: Research Square preprint supplement (doi:10.21203/rs.3.rs-8941374/v1)
Supplement: Supplementary file 4 [file 3fde7c37916430a7dace5d6d.docx]

**Table (5):** **The Procalcitonin levels in the three studied groups at different time intervals**

| **PROCALCITONIN (pg/mL)** | **Group** | | | **Test of significance**  ***p*-value** |
| --- | --- | --- | --- | --- |
| **Control** | **Extraction without bone graft** | **Extraction with bone graft** |
| **Four weeks**   - n - Min. – Max. - Mean ± Std. Deviation - SEM - 95% CI of the Mean - 25th - 75th Percentile | 5  21.90-28.90  24.52**a**±2.75  1.23  21.11-27.93  22.70-25.20 | 5  51.90-58.90  54.52**b**±2.75  1.23  51.11-57.93  52.70-55.20 | 5  35.90-38.90  37.54**c**±1.28  0.57  35.95-39.13  36.70-38.70 | F(BF)(df=2,9.612)=202.639  *p*<.001* |
| **Six weeks**   - n - Min. – Max. - Mean ± Std. Deviation - SEM - 95% CI of the Mean - 25th - 75th Percentile | 5  21.90-28.90  24.52**a**±2.75  1.23  21.11-27.93  22.70-25.20 | 5  43.00-49.50  46.26**b**±2.40  1.08  43.27-49.25  45.30-47.30 | 5  31.50-34.00  33.12**c**±1.06  0.47  31.80-34.44  32.60-33.90 | F(BF)(df=2,9.119)=124.334  *p*<.001* |
| **Paired t-test**  ***p*-value** | NA | t(df=4)=3.956  *p*=.017* | t(df=4)=8.274  *p*=.001* |  |
| 4 weeks | | | | |
|  | **Control** | **Extraction without bone graft** | **Extraction with bone graft** |  |
| **Control** |  | **Diff=30.00**  ***p<*.001** | **Diff=13.02**  ***p=*.025*** |
| **Extraction without bone graft** |  |  | **Diff=16.98**  ***p<*.001** |
| Six weeks | | | | |
|  | **Control** | **Extraction without bone graft** | **Extraction with bone graft** |  |
| **Control** |  | **Diff=21.70**  ***p<*.001** | **Diff=8.600**  ***p<*.001** |
| **Extraction without bone graft** |  |  | **Diff=13.14**  ***p<*.001** |

n: number of rats Min-Max: Minimum – Maximum

S.D.: Standard Deviation SEM: Standard Error of Mean CI: Confidence interval

F: F(ANOVA) Test of Analysis F(BF): Brown-Forsythe df: degree of freedom

*: Statistically significant (*p*<.05) NS: Statistically not significant (*p*≥.05) NA: non applicable
