# Supplementary material
Source: Research Square preprint supplement (doi:10.21203/rs.3.rs-8941374/v1)
Supplement: Supplementary file 5 [file 8c6b9ac5e3d132dc236a0c7c.docx]

**Table (3):** **The Osteocalcin levels in the three studied groups at different time intervals**

| **Osteocalcin (ng/mL)** | **Group** | | | **Test of significance**  ***p*-value** |
| --- | --- | --- | --- | --- |
| **Control** | **Extraction without bone graft** | **Extraction with bone graft** |
| **Four weeks**   - n - Min. – Max. - Mean ± Std. Deviation - SEM - 95% CI of the Mean - 25th - 75th Percentile | 5  18.5-21.0  19.5**a**±1.0  0.4  18.3-20.7  18.9-19.9 | 5  11.9-13.5  12.6**b**±0.7  0.3  11.8-13.5  12.1-13.2 | 5  15.6-16.6  16.0**c**±0.4  0.2  15.6-16.5  15.9-16.1 | F(BF)(df=2,8.543)=114.610  *p*<.001* |
| **Six weeks**   - n - Min. – Max. - Mean ± Std. Deviation - SEM - 95% CI of the Mean - 25th - 75th Percentile | 5  18.5-21.0  19.7**a**±1.3  0.6  18.1-21.2  18.5-21.0 | 5  13.2-15.9  14.2**b**±1.0  0.5  12.9-15.5  13.6-14.3 | 5  16.0-18.1  17.2**c**±0.9  0.4  16.1-18.3  16.7-17.9 | F(BF)(df=2,10.994)=33.251  *p*<.001* |
| **Paired t-test**  ***p*-value** | t(df=4)=0.270  *p*=.800 NS | t(df=4)=2.081  *p*=.106 NS | t(df=4)=2.989  *p*=.040* |  |
| **Four weeks** | | | | |
|  | **Control** | **Extraction without bone graft** | **Extraction with bone graft** |  |
| **Control** |  | **Diff=6.90**  ***p<*.001** | **Diff=3.52**  ***p<*.001** |
| **Extraction without bone graft** |  |  | **Diff=-3.38**  ***p<*.001** |
| **Six weeks** | | | | |
|  | **Control** | **Extraction without bone graft** | **Extraction with bone graft** |  |
| **Control** |  | **Diff=5.50**  ***p<*.001** | **Diff=2.50**  ***p=*.009** |
| **Extraction without bone graft** |  |  | **Diff=-3.00**  ***p=*.002** |

n: number of rats Min-Max: Minimum – Maximum

S.D.: Standard Deviation SEM: Standard Error of Mean CI: Confidence interval

F: F(ANOVA) Test of Analysis F(BF): Brown-Forsythe df: degree of freedom

*: Statistically significant (*p*<.05)

NS: Statistically not significant (*p*≥.05)
