# Supplementary material
Source: Research Square preprint supplement (doi:10.21203/rs.3.rs-8941374/v1)
Supplement: Supplementary file 6 [file 8f4e6dad54909ebd0c43b5b6.docx]

**Table (7):** **The IL-1B levels in the three studied groups at different time intervals**

| **IL-1B (pg/mL)** | **Group** | | | **Test of significance**  ***p*-value** |
| --- | --- | --- | --- | --- |
| **Control** | **Extraction without bone graft** | **Extraction with bone graft** |
| **Four weeks**   - n - Min. – Max. - Mean ± Std. Deviation - SEM - 95% CI of the Mean - 25th - 75th Percentile | 5  33.90-39.80  35.68**a**±2.39  1.07  32.71-38.65  34.50-35.70 | 5  63.90-69.80  66.60**b**±2.69  1.20  63.26-69.94  64.50-69.10 | 5  41.90-44.40  43.30**c**±1.00  0.45  42.06-44.54  42.70-43.90 | F(BF)(df=2,9.043)=278.493  *p*<.001* |
| **Six weeks**   - n - Min. – Max. - Mean ± Std. Deviation - SEM - 95% CI of the Mean - 25th - 75th Percentile | 5  34.50-39.80  36.86**a,c**±2.73  1.22  33.47-40.25  34.50-39.80 | 5  47.30-50.30  49.14**b**±1.40  0.62  47.40-50.88  48.00-50.30 | 5  36.70-43.00  39.16±**a,c**2.44  1.09  36.12-42.20  37.50-39.70 | F(BF)(df=2,9.957)=41.578  *p*<.001* |
| **Paired t-test**  ***p*-value** | t(df=4)=1.546  *p*=.197 NS | t(df=4)=13.307  *p*<.001* | t(df=4)=2.747  *p*=.052 NS |  |
| Four weeks | | | | |
|  | **Control** | **Extraction without bone graft** | **Extraction with bone graft** |  |
| **Control** |  | **Diff=30.92**  ***p<*.001** | **Diff=7.62**  ***p<*.001** |
| **Extraction without bone graft** |  |  | **Diff=23.30**  ***p<*.001** |
| Six weeks | | | | |
|  | **Control** | **Extraction without bone graft** | **Extraction with bone graft** |  |
| **Control** |  | **Diff=12.28**  ***p<*.001** | Diff=2.30  *p=*.402 NS |
| **Extraction without bone graft** |  |  | **Diff=9.98**  ***p<*.001** |

n: number of rats Min-Max: Minimum – Maximum

S.D.: Standard Deviation SEM: Standard Error of Mean CI: Confidence interval

F: F(ANOVA) Test of Analysis F(BF): Brown-Forsythe df: degree of freedom

*: Statistically significant (*p*<.05) NS: Statistically not significant (*p*≥.05) NA: non applicable
