# Supplementary material
Source: Research Square preprint supplement (doi:10.21203/rs.3.rs-8941374/v1)
Supplement: Supplementary file 7 [file a5301fad60120a41957cf47d.docx]

**Table (4):** **The TNF-alpha levels in the three studied groups at different time intervals**

| **TNF-alpha (ng/mL)** | **Group** | | | **Test of significance**  ***p*-value** |
| --- | --- | --- | --- | --- |
| **Control** | **Extraction without bone graft** | **Extraction with bone graft** |
| **Four weeks**   - n - Min. – Max. - Mean ± Std. Deviation - SEM - 95% CI of the Mean - 25th - 75th Percentile | 5  48.10-50.30  48.94**a**±0.83  0.37  47.91-49.97  48.50-49.00 | 5  77.50-79.50  78.68**b**±0.79  0.36  77.69-79.67  78.30-79.20 | 5  52.10-56.50  54.24**c**±1.73  0.77  52.10-56.38  53.20-55.30 | F(BF)(df=2,7.598)=877.220  *p*<.001* |
| **Six weeks**   - n - Min. – Max. - Mean ± Std. Deviation - SEM - 95% CI of the Mean - 25th - 75th Percentile | 5  48.50-49.00  48.82**a**±0.20  0.09  48.57-49.07  48.80-49.00 | 5  67.50-69.50  68.68**b**±0.79  0.36  67.69-69.67  68.30-69.20 | 5  43.80-48.90  46.44**c**±1.89  0.85  44.09-48.79  45.70-47.30 | F(BF)(df=2,5.477)=526.048  *p*<.001* |
| **Paired t-test**  ***p*-value** | t(df=4)=0.393  *p*=.715 NS | t(df=4)=52.705  *p*<.001* | t(df=4)=10.207  *p*=.001* |  |
| **Four weeks** | | | | |
|  | **Control** | **Extraction without bone graft** | **Extraction with bone graft** |  |
| **Control** |  | **Diff=29.74**  ***p<*.001** | **Diff=5.300**  ***p<*.001** |
| **Extraction without bone graft** |  |  | **Diff=24.44**  ***p<*.001** |
| **six weeks** | | | | |
|  | **Control** | **Extraction without bone graft** | **Extraction with bone graft** |  |
| **Control** |  | **Diff=19.86**  ***p<*.001** | **Diff=2.38**  ***p=*.025*** |
| **Extraction without bone graft** |  |  | **Diff=22.24**  ***p<*.001** |

n: number of rats Min-Max: Minimum – Maximum

S.D.: Standard Deviation SEM: Standard Error of Mean CI: Confidence interval

F: F(ANOVA) Test of Analysis F(BF): Brown-Forsythe df: degree of freedom

*: Statistically significant (*p*<.05)

NS: Statistically not significant (*p*≥.05)
