# Supplementary material
Source: Research Square preprint supplement (doi:10.21203/rs.3.rs-8941374/v1)
Supplement: Supplementary file 8 [file c75a6d905726336d63d67568.docx]

**Table (1):** **The CRP levels in the three studied groups at different time intervals**

| **CRP (mg/L)** | **Group** | | | **Test of significance**  ***p*-value** |
| --- | --- | --- | --- | --- |
| **Control** | **Extraction without bone graft** | **Extraction with bone graft** |
| **Four weeks**   - n - Min. – Max. - Mean ± Std. Deviation - SEM - 95% CI of the Mean - 25th - 75th Percentile | 5  2.20-3.20  2.70**a**±0.37  0.17  2.24-3.16  2.60-2.90 | 5  5.70-6.90  6.10**b**±0.48  0.22  5.50-6.70  5.80-6.20 | 5  3.90-5.20  4.62**c**±0.48  0.21  4.03-5.21  4.50-4.80 | F(BF)(df=2,11.473)=72.412  *p*<.001* |
| **Six weeks**   - n - Min. – Max. - Mean ± Std. Deviation - SEM - 95% CI of the Mean - 25th - 75th Percentile | 5  2.60-3.20  2.90 **a**,**c**±0.30  0.13  2.53-3.27  2.60-3.20 | 5  4.20-5.70  4.88**b**±0.54  0.24  4.21-5.55  4.70-4.90 | 5  2.50-3.90  3.46**a,c**±0.56  0.25  2.77-4.15  3.50-3.80 | F(BF)(df=2,10.098)=22.483  *p*<.001* |
| **Paired t-test**  ***p*-value** | t(df=4)=0.904  *p*=.417 NS | t(df=4)=4.771  *p*=.009* | t(df=4)=3.520  *p*=.024* |  |
| **Four weeks** | | | | |
|  | **Control** | **Extraction without bone graft** | **Extraction with bone graft** |  |
| **Control** |  | **Diff=3.400**  ***p<*.001** | **Diff=1.92**  ***p<*.001** |
| **Extraction without bone graft** |  |  | **Diff=1.4**  ***P=*.001** |
| **Six weeks** | | | | |
|  | **Control** | **Extraction without bone graft** | **Extraction with bone graft** |  |
| **Control** |  | **Diff=1.98**  ***p<*.001** | Diff=0.560  *p=*.272 |
| **Extraction without bone graft** |  |  | **Diff=1.42**  ***P=*.002** |

n: Number of rats

Min-Max: Minimum – Maximum S.D.: Standard Deviation

SEM: Standard Error of Mean CI: Confidence interval

F: F(ANOVA) Test of Analysis

F(BF): Brown-Forsythe df: degree of freedom

*: Statistically significant (*p*<.05)

NS: Statistically not significant (*p*≥.05)
